# Supplementary material for: MicroRNA-124 promotes hepatic triglyceride accumulation through targeting tribbles homolog 3
Source: PubMed Central journal article supplement (PMC5109039; doi:10.1038/srep37170), 2016-11-15
Supplement: srep37170-s1.pdf [file srep37170-s1.pdf]

---

**MicroRNA-124 promotes hepatic triglyceride accumulation through targeting  
tribbles homolog 3**

Xing Liu<sup>1,+</sup>, Jiejie Zhao<sup>1,+</sup>, Qi Liu<sup>2,+</sup>, Xuelian Xiong<sup>3</sup>, Zhijian Zhang<sup>4</sup>, Yang Jiao<sup>1</sup>,  
Xiaoying Li<sup>1,3</sup>, Bin Liu<sup>5</sup>, Yao Li<sup>6\*</sup>, Yan Lu<sup>1,3,5\*</sup>

<sup>1</sup>Department of Endocrine and Metabolic Diseases, Shanghai Institute of Endocrinology and Metabolism, Ruijin Hospital, Shanghai Jiao Tong University School of Medicine, Shanghai, China.

<sup>2</sup>Department of Endocrinology and Diabetes, The First Affiliated Hospital of Xiamen University, Xiamen Diabetes Institute, Xiamen, China.

<sup>3</sup>Department of Endocrinology, Fudan Institute for Metabolic Diseases, Zhongshan Hospital, Fudan University, Shanghai, China.

<sup>4</sup>Department of Endocrinology and Metabolism, Shanghai General Hospital, Shanghai Jiaotong University School of Medicine, Shanghai, China.

<sup>5</sup>Hubei Key Laboratory for Kidney Disease Pathogenesis and Intervention, Hubei Polytechnic University School of Medicine, Huangshi, Hubei, China

<sup>6</sup>Department of Laboratory Animal Science, Shanghai Jiao Tong University School of Medicine, Shanghai, China.

+These authors contributed equally to this work.

Correspondence and requests for materials should be addressed to Y.Li. ([yao.li@shsmu.edu.cn](mailto:yao.li@shsmu.edu.cn)) or Y.Lu. ([lu.yan2@zs-hospital.sh.cn](mailto:lu.yan2@zs-hospital.sh.cn)).

---

**Supplementary Figure:**

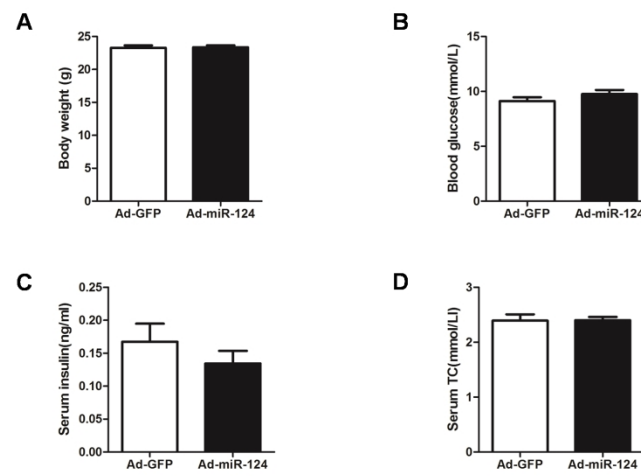

**Fig.S1 Overexpression of miR-124 does not alter systemic metabolic parameters**

(A-D) Body weight (A), blood glucose (B), serum insulin (C) and TC levels (D) in mice infected with Ad-GFP or Ad-miR-124 (n=8–10).
